# Supplementary material
Source: Springer Nature journal article supplement (https://www.springermedizin.de/resource/supplementary/12968_2009_501_MOESM2_ESM.pdf/9579122)

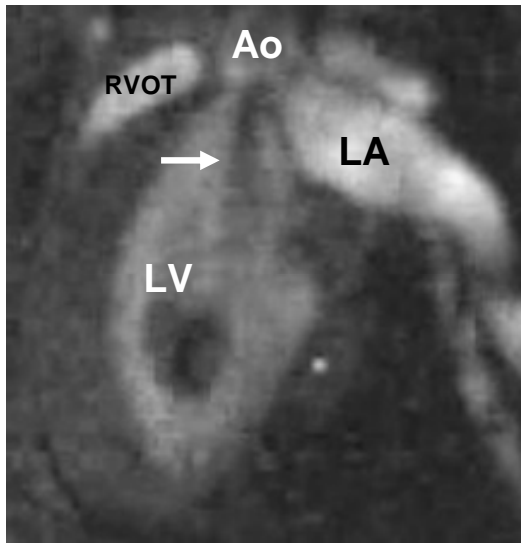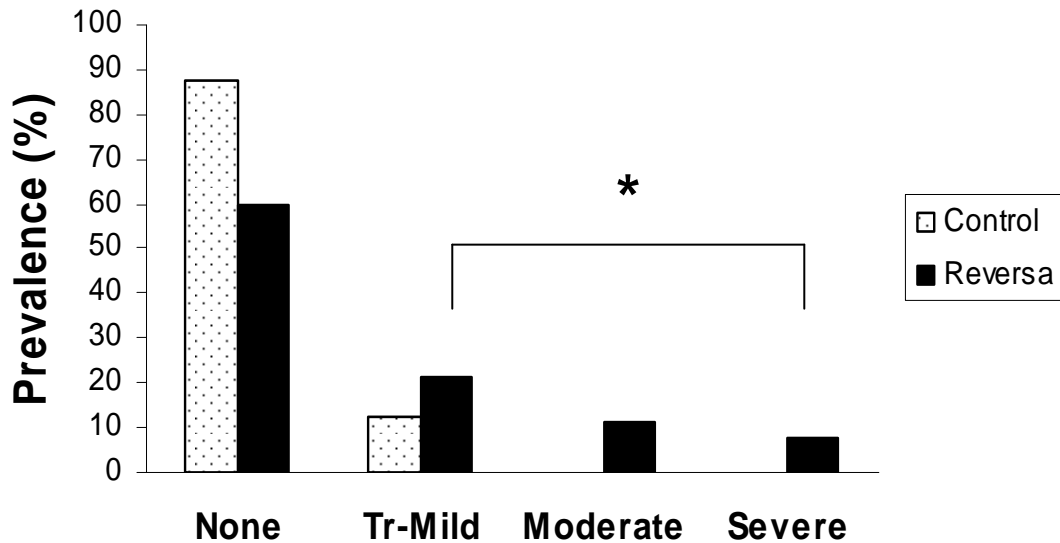

Supplement: MOESM2 [file 9579122]
